# Supplementary material for: Achieving a tunable and ultra-broadband near-infrared emission in the Ga2−2xZnxGexO3:Cr3+ phosphor
Source: Royal Society of Chemistry journal article supplement (doi:10.1039/d2dt02971e), 2022-01-01
Supplement: d2dt02971e1.pdf [file d2dt02971e1.pdf]

## Supporting Information

### Achieving a tunable and ultra-broadband near-infrared emission in the $\text{Ga}_{2-2x}\text{Zn}_x\text{Ge}_x\text{O}_3$ : $\text{Cr}^{3+}$ phosphor

Liwei Zeng<sup>a</sup>, Jiyou Zhong<sup>a,\*</sup>, Wenbin Lin<sup>a</sup> and Weiren Zhao<sup>a,b,\*</sup>

<sup>a</sup>School of Physics and Optoelectronic Engineering, Guangdong University of Technology, Guangzhou 510006, China. Email: [zhongjiyou@126.com](mailto:zhongjiyou@126.com); [zwren123@126.com](mailto:zwren123@126.com).

<sup>b</sup>Guangdong Provincial Key Laboratory of Information Photonics Technology, Guangdong University of Technology, Guangzhou 510006, China.

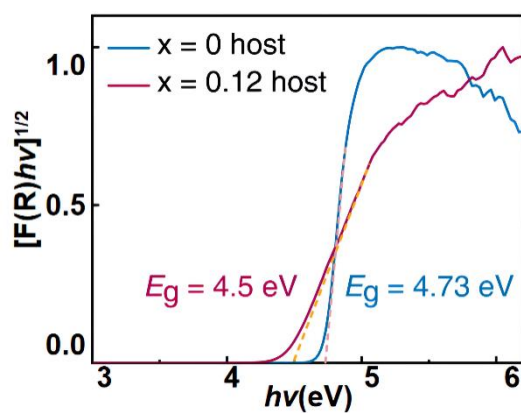

**Fig. S1.** The optical band gap ( $E_g$ ) of  $\text{Ga}_2\text{O}_3$  and  $\text{Ga}_{1.76}\text{Zn}_{0.12}\text{Ge}_{0.12}\text{O}_3$  host.

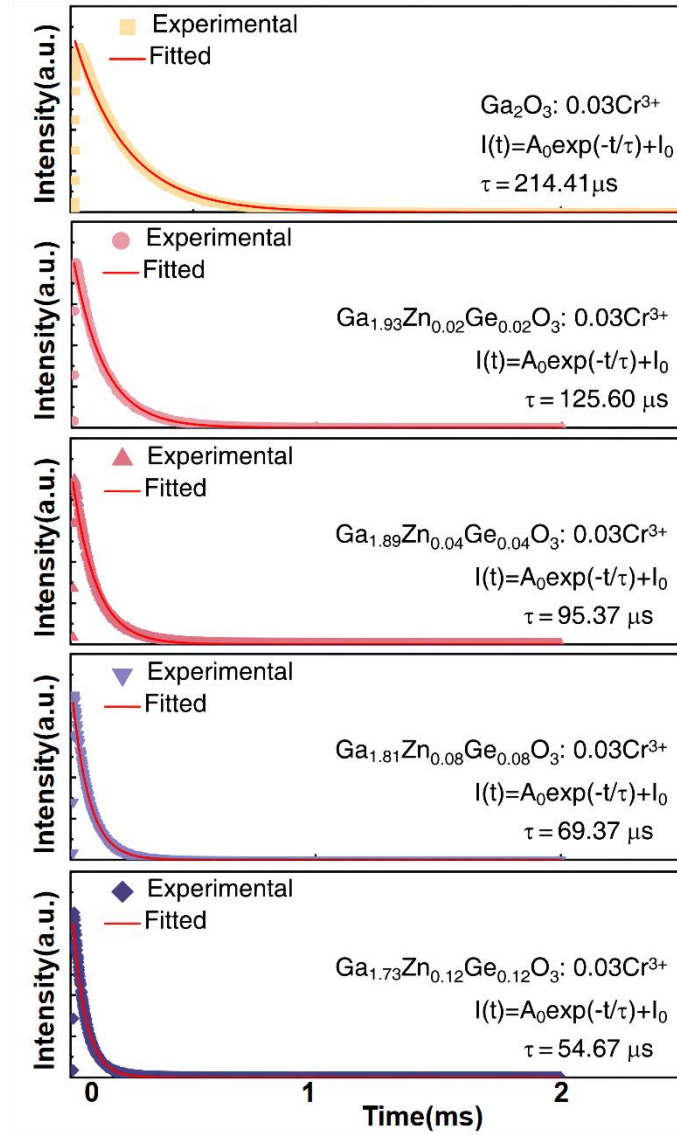

Fig. S2. Single-exponential fitting decay curve of  $\text{Ga}_{1.97-2x}\text{Zn}_x\text{Ge}_x\text{O}_3: 0.03\text{Cr}^{3+}$  ( $x = 0-0.12$ ).

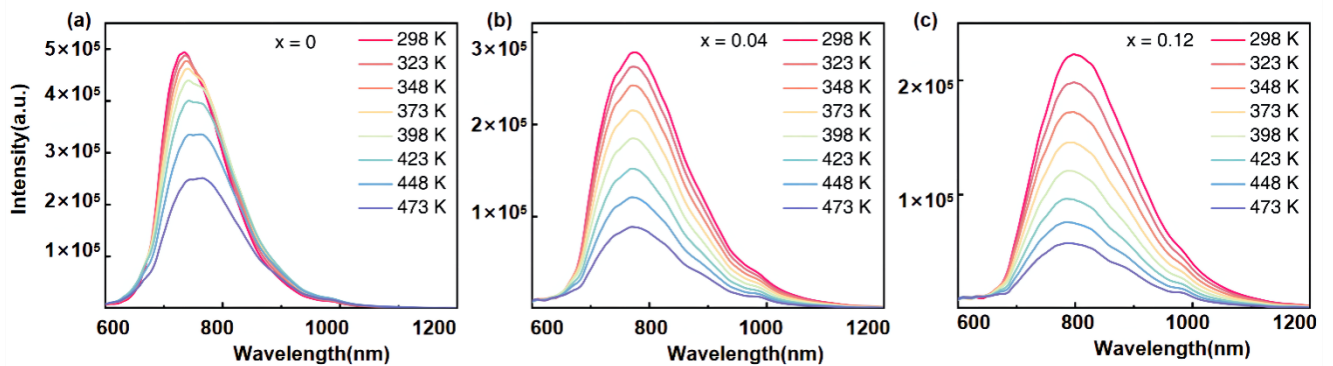

Fig. S3. Temperature-dependent PL spectra of  $\text{Ga}_{1.97-2x}\text{Zn}_x\text{Ge}_x\text{O}_3: 0.03\text{Cr}^{3+}$  ( $x = 0, 0.04, \text{ and } 0.12$ ).

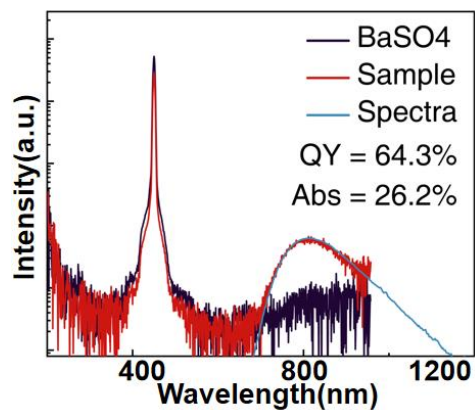

**Fig. S4.** The PLQY and absorption efficiency of  $\text{Sc}_{0.98}\text{BO}_3: 0.02\text{Cr}^{3+}$ .

**Table S1.** The refined atomic positions and site occupation of  $\text{Ga}_2\text{O}_3: 0.03\text{Cr}^{3+}$  and  $\text{Ga}_{1.73}\text{Zn}_{0.12}\text{Ge}_{0.12}\text{O}_3: 0.03\text{Cr}^{3+}$ .

| formula | $\text{Ga}_{1.97}\text{O}_3: 0.03\text{Cr}^{3+}$ |           |          |           | $\text{Ga}_{1.73}\text{Zn}_{0.12}\text{Ge}_{0.12}\text{O}_3: 0.03\text{Cr}^{3+}$ |      |           |          |            |
|---------|--------------------------------------------------|-----------|----------|-----------|----------------------------------------------------------------------------------|------|-----------|----------|------------|
| atom    | occ.                                             | <i>x</i>  | <i>y</i> | <i>z</i>  | atom                                                                             | occ. | <i>x</i>  | <i>y</i> | <i>z</i>   |
| Ga(1)   | 1                                                | 0.0893(3) | 0        | 0.2941(9) | Ga(1)                                                                            | 0.88 | 0.0906(7) | 0        | 0.2921(8)  |
| O(1)    | 1                                                | 0.1568(1) | 0        | 0.6007(9) | O(1)                                                                             | 1    | 0.1650(5) | 0        | 0.6133(9)  |
| O(2)    | 1                                                | 0.1698(8) | 0        | 0.0674(0) | O(2)                                                                             | 1    | 0.1716(3) | 0        | 0.0700(7)  |
| Ga(2)   | 0.97                                             | 0.3415(7) | 0        | 0.1876(9) | Ga(2)                                                                            | 0.85 | 0.3411(9) | 0        | 0.1854(7)  |
| O(3)    | 1                                                | 0.4992(5) | 0        | 0.2426(0) | O(3)                                                                             | 1    | 0.5077(0) | 0        | 0.2431(2)  |
| Cr      | 0.03                                             | 0.6520(4) | 0        | 0.2514(6) | Cr                                                                               | 0.03 | 0.3413(9) | 0        | 0.1864(2)  |
|         |                                                  |           |          |           | Zn                                                                               | 0.12 | 0.1474(1) | 0        | -0.1387(1) |
|         |                                                  |           |          |           | Ge                                                                               | 0.12 | 0.1169(0) | 0        | 0.4151(7)  |

**Table S2.** The refined crystal structure of  $\text{Ga}_{1.97}\text{O}_3: 0.03\text{Cr}^{3+}$ , and  $\text{Ga}_{1.73}\text{Zn}_{0.12}\text{Ge}_{0.12}\text{O}_3: 0.03\text{Cr}^{3+}$  with  $\text{Zn}^{2+}$  and  $\text{Ge}^{4+}$  occupying different  $\text{Ga}^{3+}$  sites.

| formula                            | $\text{Ga}_{1.97}\text{O}_3: 0.03\text{Cr}^{3+}$ | $\text{Ga}_{1.73}\text{Zn}_{0.12}\text{Ge}_{0.12}\text{O}_3: 0.03\text{Cr}^{3+}$ |                                   |                                             |                                             |
|------------------------------------|--------------------------------------------------|----------------------------------------------------------------------------------|-----------------------------------|---------------------------------------------|---------------------------------------------|
|                                    |                                                  | $[\text{Ga}/\text{Zn}]\text{O}_6$                                                | $[\text{Ga}/\text{Ge}]\text{O}_6$ | $[\text{Ga}]\text{O}_6$                     | $[\text{Ga}/\text{Zn}/\text{Ge}]\text{O}_6$ |
|                                    |                                                  | $[\text{Ga}/\text{Ge}]\text{O}_4$                                                | $[\text{Ga}/\text{Zn}]\text{O}_4$ | $[\text{Ga}/\text{Zn}/\text{Ge}]\text{O}_4$ | $[\text{Ga}]\text{O}_4$                     |
| radiation type; $\lambda$ (Å)      | X-ray; 1.5406                                    | X-ray; 1.5406                                                                    | X-ray; 1.5406                     | X-ray; 1.5406                               | X-ray; 1.5406                               |
| $2\theta$ range (°)                | 5-120                                            | 5-120                                                                            | 5-120                             | 5-120                                       | 5-120                                       |
| temperature (°C)                   | 25                                               | 25                                                                               | 25                                | 25                                          | 25                                          |
| space group; $Z$                   | $C2/m;2$                                         | $C2/m;2$                                                                         | $C2/m;2$                          | $C2/m;2$                                    | $C2/m;2$                                    |
| $a$ (Å)                            | 12.2300(6)                                       | 12.2626(8)                                                                       | 12.2626(9)                        | 12.2626(7)                                  | 12.2629(3)                                  |
| $b$ (Å)                            | 3.0410(2)                                        | 3.0440(0)                                                                        | 3.0439(8)                         | 3.0439(8)                                   | 3.0440(4)                                   |
| $c$ (Å)                            | 5.8099(0)                                        | 5.8071(0)                                                                        | 5.8070(3)                         | 5.8070(2)                                   | 5.8072(0)                                   |
| $\beta$ (°)                        | 103.82(7)                                        | 103.71(3)                                                                        | 103.71(6)                         | 103.71(6)                                   | 103.71(6)                                   |
| unit cell volume (Å <sup>3</sup> ) | 216.07(8)                                        | 216.76(3)                                                                        | 216.75(3)                         | 216.75(3)                                   | 216.77(3)                                   |
| $R_p$                              | 0.0350                                           | 0.0335                                                                           | 0.0557                            | 0.0555                                      | 0.0757                                      |
| $R_{wp}$                           | 0.0551                                           | 0.0736                                                                           | 0.0836                            | 0.0834                                      | 0.1051                                      |
| $\chi^2$                           | 4.95                                             | 8.65                                                                             | 11.15                             | 11.10                                       | 17.59                                       |
